# Supplementary material for: Aggregatibacter actinomycetemcomitans Leukotoxin Is Delivered to Host Cells in an LFA-1-Indepdendent Manner When Associated with Outer Membrane Vesicles
Source: PubMed Central journal article supplement (PMC6215133; doi:10.3390/toxins10100414), 2018-10-13
Supplement: toxins-10-00414-s001.pdf [file toxins-10-00414-s001.pdf]

## Supplementary Materials: *Aggregatibacter actinomycetemcomitans* Leukotoxin Is Delivered to Host Cells in an LFA-1-Independent Manner When Associated with Outer Membrane Vesicles

Justin B. Nice, Nataliya V. Balashova, Scott C. Kachlany, Evan Koufos, Eric Krueger, Edward T. Lally, Angela C. Brown

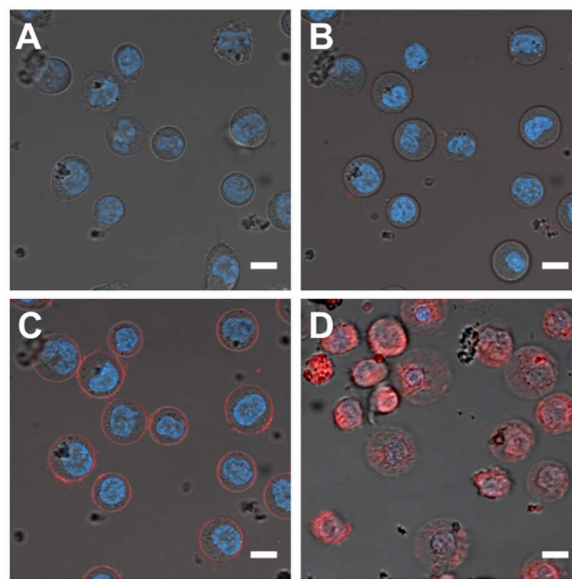

**Figure S1.** OMV association with THP-1 cells. R18-OMVs were incubated with THP-1 cells for 0 h (A), 1 h (B), 2 h (C), or 5 h (D) and imaged by confocal microscopy. At the initial time points (0 h and 1 h), very little cell-associated fluorescence is observed. R18-OMVs can be seen to be associated with the cell membrane at the 2 h time point. After a 5 h incubation, the fluorescence is observed throughout the cells. Scale bar = 100  $\mu\text{m}$ .
